# Supplementary material for: Comprehensive analysis of expression profiles and prognosis of TRIM genes in human kidney clear cell carcinoma
Source: publisher site journal article supplement (doi:10.18632/aging.204102), 2022-05-26
Supplement: Supplementary file [file aging-v14i10-204102-supplementary-material-SD1.pdf]

## SUPPLEMENTARY TABLE

**Supplementary Table 1. Prediction of downstream TRIM26 regulation ubiquitination.**

| <b>From the iUUCD results (n=24)</b>                                                                                                                                 | <b>From the ubibrowser tool (n=50)</b>                                                                                                                                                                                                                                                                                                                      |
|----------------------------------------------------------------------------------------------------------------------------------------------------------------------|-------------------------------------------------------------------------------------------------------------------------------------------------------------------------------------------------------------------------------------------------------------------------------------------------------------------------------------------------------------|
| CAND1, MEPCE, MNAT1, USP36, UBE2D1, UBE2D3, OTUB2, SOX2, SRRM2, MAGEA6, CEBPD, SUMO2, USP5, TRIM41, USP39, PHF7, RNF126, UBC, RABEP1, RNF10, SON, PNKP, RNF2, UBE2D2 | PRKD1, DDX54, SMARCA5, DDX47, RPS6KA3, DDX52, HMGB1, YBX3, ARAF, P4HB, A2M, ERCC3, HNRNPD, STRN, SRRM1, ARFGEF1, LRP1, ZMYM2, POLR3F, BCR, EPB41, RPLP0, GPN1, UBR1, TSR1, CWC22, AP1B1, TP53RK, THOC2, LSM1, IFIT2, SNRPB, BAG3, NF2, MARK2, TUBB4B, CNBP, CDC5L, MED12, ABCF3, FTSJ3, SEPTIN2, POLA1, BAD, SNCA, POLR2D, HNRNPA2B1, PARD3, STRN3, EXPSC10 |
